# Supplementary material for: Response of the characteristics of organic carbon mineralization of soft rock and soil composed of sand to soil depth
Source: PeerJ. 2021 Jun 4;9:e11572. doi: 10.7717/peerj.11572 (PMC8183430; doi:10.7717/peerj.11572)
Supplement: Supplemental Information 1 — Soil physicochemical properties and organic carbon mineralization rate, cumulative mineralization amount, cumulative mineralization rate and kinetic equation fitting parameters. The organic carbon mineralization raw data were obtained under the conditions of 58 days of indoor incubation. CK represents the volume ratio of soft rock to sand is 0:1; S1 represents a volume ratio of soft rock to sand of 1:5; S2 represents a volume ratio of soft rock to sand of 1:2; S3 represents the volumetric ratio of soft rock to sand is 1:1. [file peerj-09-11572-s001.xlsx]

## Sheet: SOC mineralization rate
		1	3	5	7	9	16	23	30	37	44	51	58
0-10	CK	67.1	27.5	27.588	64.977	25.531	39.567	22.9597	30.008	25.773	28.314	24.2999	13.31
0-10	S1	103.767	30.4333	37.026	78.045	32.549	44.165	23.8672	34.848	42.6525	37.268	31.9357	22.506
0-10	S2	56.8333	23.8333	18.15	56.991	46.948	11.737	16.093	9.16575	11.858	16.698	17.424	12.8012
0-10	S3	73.7	35.5667	28.314	75.867	26.015	22.143	14.9738	28.798	20.1465	22.99	21.78	17.8319
10-20	CK	60.5	7.7	6.534	52.635	36.058	27.588	9.317	5.445	4.5375	6.05	3.267	3.90775
10-20	S1	89.1	23.1	39.204	60.621	37.268	34.001	17.061	14.0663	25.41	18.3315	13.794	15.1369
10-20	S2	77.3667	22.3667	28.314	75.141	20.328	12.221	25.289	16.6073	12.584	25.047	13.552	9.11808
10-20	S3	75.1667	23.8333	31.944	83.127	10.406	24.321	26.983	13.7033	26.62	31.3995	20.328	17.6522
20-30	CK	66.3667	23.8333	21.054	72.237	23.837	24.321	23.1412	24.926	21.78	27.346	24.2	19.8083
20-30	S1	50.9667	8.43333	32.67	53.361	8.349	12.947	12.0698	12.584	9.075	30.734	21.4252	8.954
20-30	S2	55.3667	19.4333	29.04	76.593	13.189	13.189	12.9772	15.488	12.1605	23.232	8.954	8.39942
20-30	S3	75.9	21.6333	18.15	77.319	21.659	16.819	13.8848	13.552	18.513	22.264	8.228	13.0708

## Sheet: SOC cumulative mineralization
Soil layer	Treatment	1	3	5	7	9	16	23	30	37	44	51	58
0-10	CK	67.1	94.6	122.188	187.165	263.758	382.459	474.298	564.322	667.414	752.356	825.256	865.186
0-10	S1	103.767	134.2	171.226	249.271	346.918	479.413	574.882	679.426	850.036	961.84	1057.65	1125.17
0-10	S2	56.8333	80.6667	98.8167	155.808	296.652	331.863	396.235	423.732	471.164	521.258	573.53	611.934
0-10	S3	73.7	109.267	137.581	213.448	291.493	357.922	417.817	504.211	584.797	653.767	719.107	772.602
10-20	CK	60.5	68.2	74.734	127.369	235.543	318.307	355.575	371.91	390.06	408.21	418.011	429.734
10-20	S1	89.1	112.2	151.404	212.025	323.829	425.832	494.076	536.275	637.915	692.909	734.291	779.702
10-20	S2	77.3667	99.7333	128.047	203.188	264.172	300.835	401.991	451.813	502.149	577.29	617.946	645.3
10-20	S3	75.1667	99	130.944	214.071	245.289	318.252	426.184	467.294	573.774	667.972	728.956	781.913
20-30	CK	66.3667	90.2	111.254	183.491	255.002	327.965	420.53	495.308	582.428	664.466	737.066	796.491
20-30	S1	50.9667	59.4	92.07	145.431	170.478	209.319	257.598	295.35	331.65	423.852	488.128	514.99
20-30	S2	55.3667	74.8	103.84	180.433	220	259.567	311.476	357.94	406.582	476.278	503.14	528.338
20-30	S3	75.9	97.5333	115.683	193.002	257.979	308.436	363.975	404.631	478.683	545.475	570.159	609.372

## Sheet: Cumulative mineralization rate
	SOC
		0-10	10-20	20-30
	CK	2.02333	3.45333	3.52
	S1	4.23646	3.48436	2.94352
	S2	3.561	3.45373	2.83464
	S3	4.40848	3.42494	3.15479
	Cumulative mineralization
		0-10	10-20	20-30
	CK	865.186	429.734	796.491
	S1	1125.17	779.702	514.99
	S2	611.934	645.3	528.338
	S3	772.602	781.913	609.372
	Cumulative mineralization rate
		0-10	10-20	20-30
	CK	42.7604	12.444	22.6276
	S1	26.5591	22.3772	17.4957
	S2	17.1843	18.6841	18.6386
	S3	17.5254	22.83	19.3157

## Sheet: Physical and chemical propertie
	Compound ratio	Soil depth(cm)	SOC	TN	AP	AK	Clay	Silt	Sand	Texture
	1：1	0-10	5.30467	0.63612	16.9032	100.328	1.91	30.23	67.86	Sandy loam
	1：1	10-20	4.95858	0.580183	15.7279	62.792	2.38	32.93	64.69	Sandy loam
	1：1	20-30	2.29369	0.297431	5.27993	34.9712	1.32	19.02	79.66	Loamy sand
	1：1	0-10	4.639	0.528714	19.4406	105.627	1.54	27.38	71.08	Loamy sand
	1：1	10-20	5.25761	0.6193	16.0264	69.8576	1.82	26.26	71.92	Loamy sand
	1：1	20-30	1.23861	0.15898	7.42896	38.0624	1.26	19.45	79.29	Loamy sand
	1：1	0-10	5.44708	0.482667	13.4337	93.622	1.15	20.82	78.03	Loamy sand
	1：1	10-20	3.56849	0.428905	9.59413	74.3664	1.92	28.79	69.29	Sandy loam
	1：1	20-30	4.19609	0.451958	9.97905	42.9714	1.81	27.56	70.63	Sandy loam
	1：2	0-10	4.03299	0.434167	13.8956	108.692	0.77	15.14	84.09	Loamy sand
	1：2	10-20	3.65164	0.366757	9.09374	60.134	1.39	23.19	75.42	Loamy sand
	1：2	20-30	3.50878	0.384913	5.70644	36.2738	1.17	17.99	80.84	Loamy sand
	1：2	0-10	4.95349	0.500182	19.2254	108.692	0.95	17.49	81.56	Loamy sand
	1：2	10-20	4.69687	0.486692	12.9444	65.9944	1.53	21.73	76.74	Loamy sand
	1：2	20-30	2.98278	0.338488	7.01081	51.762	1.21	18.92	79.87	Loamy sand
	1：2	0-10	4.6206	0.497457	18.8693	116.645	1.42	24.75	73.83	Loamy sand
	1：2	10-20	4.91196	0.271618	19.0343	55.1108	1.49	23.07	75.44	Loamy sand
	1：2	20-30	2.13086	0.236345	9.84294	32.0878	0.66	11.85	87.49	Sand
	1：5	0-10	6.52101	0.628132	18.8519	20.7856	1.04	18.36	80.6	Loamy sand
	1：5	10-20	2.38289	0.258062	14.9686	71.8548	1	15.94	83.06	Loamy sand
	1：5	20-30	3.10715	0.308701	6.44613	37.5296	0	0	100	Sand
	1：5	0-10	4.54319	0.35497	23.5518	76.0408	0.85	15.41	83.74	Loamy sand
	1：5	10-20	4.83727	0.390665	13.9521	48.4132	0.74	13.64	85.62	Sand
	1：5	20-30	2.37083	0.212631	6.45481	35.018	0	0	100	Sand
	1：5	0-10	5.64129	0.473934	18.8084	97.808	0.47	10.62	88.91	Sand
	1：5	10-20	5.89224	0.492347	15.3334	54.2736	0.85	13.66	85.49	Sand
	1：5	20-30	2.02064	0.197883	7.47125	50.5062	0.48	10.26	89.26	Sand
	0：1	20-30	4.58866	0.433616	28.2391	66.413	0.58	11.76	87.66	Sand
	0：1	0-10	2.9477	0.221146	18.4333	50.0876	0	0	100	Sand
	0：1	10-20	3.96669	0.338747	11.855	44.2272	0.12	8.93	90.95	Sand
	0：1	20-30	4.01195	0.255123	9.06713	50.0876	0.7	11.97	87.33	Sand

## Sheet: Fitting parameters
0-10 cm
	C0	Standard deviation	k	Standard deviation	R2
CK	390.337	11.4852	0.11503	0.00963	0.98385
S1	576.427	106.513	0.03545	0.00986	0.97051
S2	608.466	76.5367	0.04454	0.00929	0.97531
S3	906.069	91.4683	0.03514	0.00532	0.99221
10-20 cm
	C0	Standard deviation	k	Standard deviation	R2
CK	1088.31	97.1497	0.05431	0.00839	0.9856
S1	624.62	59.1031	0.04438	0.00695	0.98707
S2	614.498	65.1832	0.04806	0.00876	0.97855
S3	782.322	156.165	0.03475	0.01037	0.968
20-30 cm
	C0	Standard deviation	k	Standard deviation	R2
CK	515.855	125.133	0.05211	0.02263	0.8316
S1	612.961	40.6927	0.04993	0.00581	0.99198
S2	498.882	58.3382	0.06634	0.01586	0.93185
S3	680.121	51.1511	0.04235	0.00516	0.99291

## Sheet: Sheet5
DOC			Before incubation	After incubation	Decrease value	Before incubation	After incubation	Decrease value	Before incubation	After incubation	Decrease value
	0-10	CK	4.56	3.67	0.44	5.21	4.32	1.09	5.26	4.37	1.14
		S1	5.15	3.85	0.85	5.8	4.5	1.5	5.85	4.55	1.55
		S2	5.39	4.12	0.82	6.04	4.77	1.47	6.09	4.82	1.52
		S3	5.37	4.23	0.7	6.02	4.88	1.35	6.07	4.93	1.4
	10-20	CK	3.08	2.34	0.29	3.73	2.99	0.94	3.78	3.04	0.99
		S1	5.11	3.75	0.91	5.76	4.4	1.56	5.81	4.45	1.61
		S2	4.74	3.62	0.67	5.39	4.27	1.32	5.44	4.32	1.37
		S3	5.44	4.27	0.72	6.09	4.92	1.37	6.14	4.97	1.42
	20-30	CK	3.05	2.33	0.27	3.7	2.98	0.92	3.75	3.03	0.97
		S1	3.42	2.84	0.13	4.07	3.49	0.78	4.12	3.54	0.83
		S2	4.62	3.71	0.46	5.27	4.36	1.11	5.32	4.41	1.16
		S3	4.82	3.94	0.42	5.47	4.59	1.07	5.52	4.64	1.12
SMBC			Before incubation	After incubation	Decrease value	Before incubation	After incubation	Decrease value	Before incubation	After incubation	Decrease value
	0-10	CK	53.32	42.48	13.84	48.52	37.68	9.04	49.12	38.28	9.64
		S1	63.12	51.32	14.8	58.32	46.52	10	58.92	47.12	10.6
		S2	79.84	68.66	14.18	75.04	63.86	9.38	75.64	64.46	9.98
		S3	98.34	84.12	17.22	93.54	79.32	12.42	94.14	79.92	13.02
	10-20	CK	58.22	47.72	13.5	53.42	42.92	8.7	54.02	43.52	9.3
		S1	83.38	67.3	19.08	78.58	62.5	14.28	79.18	63.1	14.88
		S2	98.5	79.4	22.1	93.7	74.6	17.3	94.3	75.2	17.9
		S3	88.92	78.02	13.9	84.12	73.22	9.1	84.72	73.82	9.7
	20-30	CK	63.66	51.58	15.08	58.86	46.78	10.28	59.46	47.38	10.88
		S1	63.8	52.04	14.76	59	47.24	9.96	59.6	47.84	10.56
		S2	83.96	67.76	19.2	79.16	62.96	14.4	79.76	63.56	15
		S3	84.92	67.72	20.2	80.12	62.92	15.4	80.72	63.52	16

## Sheet: Correlation
	Soil layer	Compound ratio	C0	k	SOC	TN	AP	AK	Sand	Silt	Clay	DOC	SMBC
	0-10	CK	1561.71	27.1	5.08	0.2	18.4	50	100	0	0	5.01	50.32
		S1	2242.29	23.05	9.6	0.4833	20.4333	65	84.4167	14.7967	0.7867	5.6	60.12
		S2	684.04	63.52	7.82	0.4767	17.3333	111.667	79.8267	19.1267	1.0467	5.84	76.84
		S3	1048.51	41.46	8.8467	0.55	16.5667	100	72.3233	26.1433	1.5333	5.82	95.34
	10-20	CK	454.49	99.28	6.8533	0.34	11.9333	44	90.9533	8.93	0.12	3.53	55.22
		S1	912.92	59.07	7.55	0.38	14.7667	58	84.7233	14.4133	0.8633	5.56	80.38
		S2	785.99	53.84	7.6233	0.3767	13.6667	60.3333	75.8667	22.6633	1.47	5.19	95.5
		S3	1362.71	27.57	7.92	0.5433	13.7633	69	68.6333	29.3267	2.04	5.89	85.92
	20-30	CK	1499.94	24.56	6.92	0.26	9.1	50	87.3433	11.9567	0.7	3.5	60.66
		S1	1008.93	22.68	4.31	0.24	6.8	41.3333	76.5267	3.42	0.16	3.87	60.8
		S2	637.18	54.3	4.9533	0.32	7.5	38.6667	82.7333	22.01	1.4633	5.07	80.96
		S3	717.43	56.72	4.44	0.3033	7.5667	40	96.42	16.2533	1.0133	5.27	81.92
0-10 cm	Correlation coefficient	C0	k	SOC	TN	AP	AK	Sand	Silt	Clay	DOC	SMBC	10-20 cm	Correlation coefficient	C0	k	SOC	TN	AP	AK	Sand	Silt	Clay	DOC	SMBC
	C0	1	-0.9113	0.1737	-0.2162	0.9132	-0.8016	0.4236	-0.4225	-0.4404	-0.4414	-0.6304		C0	1	-0.9523	0.9189	0.9412	0.618	0.945	-0.8682	0.8655	0.8917	0.8932	0.6163
	k	-0.9113	1	0.0623	0.3904	-0.6876	0.8958	-0.5115	0.512	0.5013	0.6317	0.574		k	-0.9523	1	-0.9925	-0.8484	-0.6912	-0.9997	0.9406	-0.9372	-0.9704	-0.9477	-0.8252
	SOC	0.1737	0.0623	1	0.9214	0.176	0.4419	-0.7947	0.7961	0.7678	0.803	0.5314		SOC	0.9189	-0.9925	1	0.7786	0.7589	0.9937	-0.913	0.9086	0.9534	0.9707	0.8758
	TN	-0.2162	0.3904	0.9214	1	-0.2094	0.7411	-0.9649	0.9657	0.9491	0.9592	0.8002		TN	0.9412	-0.8484	0.7786	1	0.3162	0.8398	-0.8566	0.8574	0.842	0.6957	0.4266
	AP	0.9132	-0.6876	0.176	-0.2094	1	-0.6825	0.456	-0.4537	-0.4956	-0.3527	-0.7365		AP	0.618	-0.6912	0.7589	0.3162	1	0.69	-0.4295	0.4198	0.5304	0.8848	0.7174
	AK	-0.8016	0.8958	0.4419	0.7411	-0.6825	1	-0.8398	0.84	0.8334	0.8891	0.8487		AK	0.945	-0.9997	0.9937	0.8398	0.69	1	-0.9443	0.9409	0.9738	0.9463	0.8372
	Sand	0.4236	-0.5115	-0.7947	-0.9649	0.456	-0.8398	1	-1	-0.9979	-0.9568	-0.9289		Sand	-0.8682	0.9406	-0.913	-0.8566	-0.4295	-0.9443	1	-0.9999	-0.9934	-0.7901	-0.7922
	Silt	-0.4225	0.512	0.7961	0.9657	-0.4537	0.84	-1	1	0.9976	0.9578	0.9276		Silt	0.8655	-0.9372	0.9086	0.8574	0.4198	0.9409	-0.9999	1	0.9921	0.7837	0.7875
	Clay	-0.4404	0.5013	0.7678	0.9491	-0.4956	0.8334	-0.9979	0.9976	1	0.9376	0.9484		Clay	0.8917	-0.9704	0.9534	0.842	0.5304	0.9738	-0.9934	0.9921	1	0.8538	0.837
	DOC	-0.4414	0.6317	0.803	0.9592	-0.3527	0.8891	-0.9568	0.9578	0.9376	1	0.8236		DOC	0.8932	-0.9477	0.9707	0.6957	0.8848	0.9463	-0.7901	0.7837	0.8538	1	0.8318
	SMBC	-0.6304	0.574	0.5314	0.8002	-0.7365	0.8487	-0.9289	0.9276	0.9484	0.8236	1		SMBC	0.6163	-0.8252	0.8758	0.4266	0.7174	0.8372	-0.7922	0.7875	0.837	0.8318	1
	Significant level	C0	k	SOC	TN	AP	AK	Sand	Silt	Clay	DOC	SMBC		Significant level	C0	k	SOC	TN	AP	AK	Sand	Silt	Clay	DOC	SMBC
	C0		0.0887	0.8263	0.7838	0.0868	0.1984	0.5764	0.5775	0.5596	0.5586	0.3696		C0		0.0477	0.0811	0.0588	0.382	0.055	0.1318	0.1345	0.1083	0.1068	0.3837
	k	0.0887		0.9377	0.6096	0.3124	0.1042	0.4885	0.488	0.4987	0.3683	0.426		k	0.0477		0.0075	0.1516	0.3088	0.0003	0.0594	0.0628	0.0296	0.0523	0.1748
	SOC	0.8263	0.9377		0.0786	0.824	0.5581	0.2053	0.2039	0.2322	0.197	0.4686		SOC	0.0811	0.0075		0.2214	0.2411	0.0063	0.087	0.0914	0.0466	0.0293	0.1242
	TN	0.7838	0.6096	0.0786		0.7906	0.2589	0.0351	0.0343	0.0509	0.0408	0.1998		TN	0.0588	0.1516	0.2214		0.6838	0.1602	0.1434	0.1426	0.158	0.3043	0.5734
	AP	0.0868	0.3124	0.824	0.7906		0.3175	0.544	0.5463	0.5044	0.6473	0.2635		AP	0.382	0.3088	0.2411	0.6838		0.31	0.5705	0.5802	0.4696	0.1152	0.2826
	AK	0.1984	0.1042	0.5581	0.2589	0.3175		0.1602	0.16	0.1666	0.1109	0.1513		AK	0.055	0.0003	0.0063	0.1602	0.31		0.0557	0.0591	0.0262	0.0537	0.1628
	Sand	0.5764	0.4885	0.2053	0.0351	0.544	0.1602		0	0.0021	0.0432	0.0711		Sand	0.1318	0.0594	0.087	0.1434	0.5705	0.0557		0.0001	0.0066	0.2099	0.2078
	Silt	0.5775	0.488	0.2039	0.0343	0.5463	0.16	0		0.0024	0.0422	0.0724		Silt	0.1345	0.0628	0.0914	0.1426	0.5802	0.0591	0.0001		0.0079	0.2163	0.2125
	Clay	0.5596	0.4987	0.2322	0.0509	0.5044	0.1666	0.0021	0.0024		0.0624	0.0516		Clay	0.1083	0.0296	0.0466	0.158	0.4696	0.0262	0.0066	0.0079		0.1462	0.163
	DOC	0.5586	0.3683	0.197	0.0408	0.6473	0.1109	0.0432	0.0422	0.0624		0.1764		DOC	0.1068	0.0523	0.0293	0.3043	0.1152	0.0537	0.2099	0.2163	0.1462		0.1682
	SMBC	0.3696	0.426	0.4686	0.1998	0.2635	0.1513	0.0711	0.0724	0.0516	0.1764			SMBC	0.3837	0.1748	0.1242	0.5734	0.2826	0.1628	0.2078	0.2125	0.163	0.1682
20-30 cm	Correlation coefficient	C0	k	SOC	TN	AP	AK	Sand	Silt	Clay	DOC	SMBC
	C0	1	-0.826	0.813	-0.7206	0.7116	0.9742	-0.1229	-0.517	-0.5488	-0.9181	-0.8531
	k	-0.826	1	-0.4104	0.9552	-0.2057	-0.6785	0.583	0.8442	0.8487	0.9761	0.9987
	SOC	0.813	-0.4104	1	-0.1948	0.9578	0.9047	0.118	0.0743	0.0392	-0.5987	-0.4484
	TN	-0.7206	0.9552	-0.1948	1	-0.03	-0.5522	0.498	0.9613	0.9662	0.8844	0.9505
	AP	0.7116	-0.2057	0.9578	-0.03	1	0.8498	0.3985	0.2132	0.1689	-0.4079	-0.2516
	AK	0.9742	-0.6785	0.9047	-0.5522	0.8498	1	0.0591	-0.3271	-0.3661	-0.8102	-0.714
	Sand	-0.1229	0.583	0.118	0.498	0.3985	0.0591	1	0.4787	0.437	0.4876	0.5457
	Silt	-0.517	0.8442	0.0743	0.9613	0.2132	-0.3271	0.4787	1	0.9984	0.7224	0.8313
	Clay	-0.5488	0.8487	0.0392	0.9662	0.1689	-0.3661	0.437	0.9984	1	0.7344	0.8385
	DOC	-0.9181	0.9761	-0.5987	0.8844	-0.4079	-0.8102	0.4876	0.7224	0.7344	1	0.9839
	SMBC	-0.8531	0.9987	-0.4484	0.9505	-0.2516	-0.714	0.5457	0.8313	0.8385	0.9839	1
	Significant level	C0	k	SOC	TN	AP	AK	Sand	Silt	Clay	DOC	SMBC
	C0		0.174	0.187	0.2794	0.2884	0.0258	0.8771	0.483	0.4512	0.0819	0.1469
	k	0.174		0.5896	0.0448	0.7943	0.3215	0.417	0.1558	0.1513	0.0239	0.0013
	SOC	0.187	0.5896		0.8052	0.0422	0.0953	0.882	0.9257	0.9608	0.4013	0.5516
	TN	0.2794	0.0448	0.8052		0.97	0.4478	0.502	0.0387	0.0338	0.1156	0.0495
	AP	0.2884	0.7943	0.0422	0.97		0.1502	0.6015	0.7868	0.8311	0.5921	0.7484
	AK	0.0258	0.3215	0.0953	0.4478	0.1502		0.9409	0.6729	0.6339	0.1898	0.286
	Sand	0.8771	0.417	0.882	0.502	0.6015	0.9409		0.5213	0.563	0.5124	0.4543
	Silt	0.483	0.1558	0.9257	0.0387	0.7868	0.6729	0.5213		0.0016	0.2776	0.1687
	Clay	0.4512	0.1513	0.9608	0.0338	0.8311	0.6339	0.563	0.0016		0.2656	0.1615
	DOC	0.0819	0.0239	0.4013	0.1156	0.5921	0.1898	0.5124	0.2776	0.2656		0.0161
	SMBC	0.1469	0.0013	0.5516	0.0495	0.7484	0.286	0.4543	0.1687	0.1615	0.0161
